# Supplementary material
Source: PubMed Central journal article supplement (PMC141016)
Supplement: pnas_0137017100_2.pdf [file pnas_0137017100_2.pdf]

**Table 2. Statistics on data collection, phasing, and model refinement**

| <b>Data collection</b>                                      |                                           |                  |                  |                             |                              |
|-------------------------------------------------------------|-------------------------------------------|------------------|------------------|-----------------------------|------------------------------|
| Data set                                                    | SeMet (in complex with NAD <sup>+</sup> ) |                  |                  | Native 1 (binary complex)   | Native 2 (ternary complex)   |
| X-ray source                                                | PF (BL-18B)                               |                  |                  | PF (BL-18B)                 | Cu K $\alpha$                |
| Temperature                                                 | 100 K                                     |                  |                  | 100 K                       | 298 K                        |
| Space group                                                 | I4                                        |                  |                  | P3 <sub>2</sub> 21          | I4                           |
| Unit cell axes, Å                                           | $a = b = 120.02, c = 140.00$              |                  |                  | $a = b = 70.38, c = 148.93$ | $a = b = 122.16, c = 141.25$ |
| Wavelength, Å                                               | 0.9798                                    | 0.9801           | 0.9500           | 1.0000                      | 1.5418                       |
| Resolution, Å                                               | 20.0–2.1                                  | 20.0–2.1         | 20.0–2.1         | 20.0–1.8                    | 20.0–2.4                     |
| Reflections, total / unique                                 | 328,553 / 57,609                          | 312,172 / 57,655 | 288,652 / 57,609 | 280,336 / 40,259            | 133,031 / 40,358             |
| Completeness*, %                                            | 99.9 (100)                                | 99.9 (100)       | 99.9 (100)       | 99.7 (99.7)                 | 99.5 (99.9)                  |
| I / $\sigma_I$                                              | 8.5 (2.6)                                 | 9.3 (2.8)        | 8.7 (2.4)        | 10.2 (2.2)                  | 18.7 (3.4)                   |
| $R_{\text{merge}}^\dagger$                                  | 7.3 (26.7)                                | 7.1 (25.9)       | 7.5 (27.1)       | 6.3 (34.5)                  | 8.4 (39.8)                   |
| <b>Phasing</b>                                              |                                           |                  |                  |                             |                              |
| Number of Se sites                                          | 20 (5 per monomer $\times$ 4 monomers)    |                  |                  |                             |                              |
| Figure of merit                                             | 0.57 / 0.83 (before / after DM)           |                  |                  |                             |                              |
| <b>Model refinement</b>                                     |                                           |                  |                  |                             |                              |
| $R_{\text{work}} / R_{\text{free}}^\ddagger$ (%)            | 20.3 / 23.6                               |                  |                  | 16.4 / 19.9                 | 16.0 / 18.7                  |
| rms deviation in bond lengths / angles, Å / °               | 0.0060 / 1.30                             |                  |                  | 0.0052 / 1.29               | 0.0067 / 1.36                |
| No. of nonhydrogen atoms / average B-factor, Å <sup>2</sup> |                                           |                  |                  |                             |                              |
| Protein (residues 2–245)                                    | 4 $\times$ 1,780 / 20.4                   |                  |                  | 2 $\times$ 1,780 / 16.8     | 4 $\times$ 1,780 / 36.4      |
| Cofactor (NAD <sup>+</sup> or NADH)                         | 4 $\times$ 44 / 19.4                      |                  |                  | 2 $\times$ 44 / 16.0        | 4 $\times$ 44 / 40.1         |
| Water                                                       | 385 / 25.9                                |                  |                  | 432 / 31.8                  | 238 / 40.4                   |
| Substrate (androsterone)                                    | –                                         |                  |                  | –                           | 4 $\times$ 21 / 52.9         |

\*Values in parentheses refer to the highest resolution shell.

$$^\dagger R_{\text{merge}} = \frac{\sum_h \sum_i |I(h)_i - \langle I(h) \rangle|}{\sum_h \sum_i I(h)_i}$$

$$^\ddagger R = \frac{\sum ||F_{\text{obs}}| - |F_{\text{calc}}||}{\sum |F_{\text{obs}}|}$$
